# Supplementary material for: Optimization and Evaluation of the Weather Research and Forecasting (WRF) Model for Wind Energy Resource Assessment and Mapping in Iran
Source: MDPI journal article supplement (doi:10.3390/app14083304), 2024-04-14
Supplement: s1 [file s1]

Archive with 1 entries (1 files):
- applsci-2880065-supplementary.pdf
